# Supplementary material for: Geochronology and Tectonic Implications of the Nianzigou Granites and Associated Mo Deposit, Inner Mongolia
Source: MDPI journal article supplement (doi:10.3390/min12070791), 2022-06-21
Supplement: s1 [file s1]

**Table S1. U-Pb isotopic dating result for zircons from the the Nianzigou granite**

| No.                     | Concentrations |     | <sup>232</sup> Th/ <sup>238</sup> U | <sup>207</sup> Pb/ <sup>206</sup> Pb | 1σ     | <sup>207</sup> Pb/ <sup>235</sup> U | 1σ     | <sup>206</sup> Pb/ <sup>238</sup> U | 1σ     | Age (Ma)                             |       |                                     |     |                                     |     |
|-------------------------|----------------|-----|-------------------------------------|--------------------------------------|--------|-------------------------------------|--------|-------------------------------------|--------|--------------------------------------|-------|-------------------------------------|-----|-------------------------------------|-----|
|                         | (ppm)          |     |                                     |                                      |        |                                     |        |                                     |        | <sup>207</sup> Pb/ <sup>206</sup> Pb | 1σ    | <sup>207</sup> Pb/ <sup>235</sup> U | 1σ  | <sup>206</sup> Pb/ <sup>238</sup> U | 1σ  |
|                         | Th             | U   |                                     |                                      |        |                                     |        |                                     |        |                                      |       |                                     |     |                                     |     |
| N02-04 granite porphyry |                |     |                                     |                                      |        |                                     |        |                                     |        |                                      |       |                                     |     |                                     |     |
| N02-04-01               | 305            | 387 | 0.7878                              | 0.0490                               | 0.0020 | 0.1636                              | 0.0065 | 0.0244                              | 0.0003 | 146                                  | 93.5  | 154                                 | 5.6 | 155                                 | 1.6 |
| N02-04-02               | 270            | 127 | 2.1344                              | 0.0513                               | 0.0034 | 0.1671                              | 0.0098 | 0.0240                              | 0.0004 | 254                                  | 149.1 | 157                                 | 8.5 | 153                                 | 2.3 |
| N02-04-03               | 114            | 128 | 0.8895                              | 0.0512                               | 0.0032 | 0.1628                              | 0.0084 | 0.0237                              | 0.0003 | 256                                  | 144.4 | 153                                 | 7.4 | 151                                 | 2.2 |
| N02-04-04               | 174            | 243 | 0.7184                              | 0.0494                               | 0.0027 | 0.1653                              | 0.0084 | 0.0243                              | 0.0003 | 165                                  | 125.9 | 155                                 | 7.3 | 155                                 | 1.8 |
| N02-04-05               | 410            | 593 | 0.6921                              | 0.0502                               | 0.0017 | 0.1666                              | 0.0053 | 0.0241                              | 0.0002 | 206                                  | 79.6  | 156                                 | 4.6 | 154                                 | 1.2 |
| N02-04-06               | 149            | 143 | 1.0450                              | 0.0491                               | 0.0033 | 0.1659                              | 0.0093 | 0.0245                              | 0.0003 | 150                                  | 151.8 | 156                                 | 8.1 | 156                                 | 2.1 |
| N02-04-07               | 626            | 691 | 0.9053                              | 0.0492                               | 0.0014 | 0.1657                              | 0.0048 | 0.0244                              | 0.0002 | 167                                  | 73.1  | 156                                 | 4.2 | 156                                 | 1.1 |
| N02-04-08               | 141            | 190 | 0.7413                              | 0.0504                               | 0.0033 | 0.1691                              | 0.0106 | 0.0246                              | 0.0003 | 213                                  | 156.5 | 159                                 | 9.2 | 157                                 | 1.8 |
| N02-04-09               | 168            | 161 | 1.0442                              | 0.0489                               | 0.0029 | 0.1650                              | 0.0085 | 0.0245                              | 0.0003 | 143                                  | 133.3 | 155                                 | 7.4 | 156                                 | 1.9 |
| N02-04-10               | 443            | 484 | 0.9160                              | 0.0500                               | 0.0024 | 0.1665                              | 0.0058 | 0.0241                              | 0.0002 | 198                                  | 112.9 | 156                                 | 5.1 | 153                                 | 1.4 |
| N02-04-11               | 291            | 353 | 0.8228                              | 0.0504                               | 0.0027 | 0.1770                              | 0.0076 | 0.0255                              | 0.0002 | 217                                  | 128.7 | 165                                 | 6.5 | 163                                 | 1.6 |
| N02-04-12               | 220            | 240 | 0.9143                              | 0.0495                               | 0.0023 | 0.1640                              | 0.0077 | 0.0240                              | 0.0003 | 169                                  | 109.2 | 154                                 | 6.7 | 153                                 | 1.6 |
| N02-04-13               | 411            | 414 | 0.9919                              | 0.0480                               | 0.0019 | 0.1614                              | 0.0053 | 0.0243                              | 0.0002 | 98.2                                 | 104.6 | 152                                 | 4.6 | 155                                 | 1.3 |
| N02-04-14               | 104            | 104 | 0.9964                              | 0.0499                               | 0.0036 | 0.1615                              | 0.0109 | 0.0236                              | 0.0004 | 191                                  | 170.3 | 152                                 | 9.5 | 150                                 | 2.4 |
| N02-04-15               | 338            | 342 | 0.9890                              | 0.0494                               | 0.0022 | 0.1640                              | 0.0062 | 0.0240                              | 0.0002 | 165                                  | 101.8 | 154                                 | 5.4 | 153                                 | 1.4 |
| N02-04-16               | 375            | 453 | 0.8263                              | 0.0496                               | 0.0023 | 0.1654                              | 0.0065 | 0.0241                              | 0.0002 | 176                                  | 107.4 | 155                                 | 5.7 | 154                                 | 1.4 |
| N02-04-17               | 324            | 418 | 0.7758                              | 0.0489                               | 0.0018 | 0.1607                              | 0.0058 | 0.0239                              | 0.0002 | 143                                  | 87.0  | 151                                 | 5.1 | 152                                 | 1.4 |
| N02-04-18               | 527            | 544 | 0.9694                              | 0.0494                               | 0.0018 | 0.1624                              | 0.0060 | 0.0239                              | 0.0002 | 165                                  | 87.0  | 153                                 | 5.2 | 152                                 | 1.4 |
| N02-04-19               | 472            | 388 | 1.2166                              | 0.0493                               | 0.0020 | 0.1626                              | 0.0065 | 0.0240                              | 0.0002 | 161                                  | 94.4  | 153                                 | 5.7 | 153                                 | 1.4 |
| N02-04-20               | 164            | 178 | 0.9208                              | 0.0502                               | 0.0032 | 0.1694                              | 0.0090 | 0.0251                              | 0.0004 | 206                                  | 147.2 | 159                                 | 7.9 | 160                                 | 2.4 |

continued

| No.                | Concentrations |      | <sup>232</sup> Th/ <sup>238</sup> U | <sup>207</sup> Pb/ <sup>206</sup> Pb | 1σ     | <sup>207</sup> Pb/ <sup>235</sup> U | 1σ     | <sup>206</sup> Pb/ <sup>238</sup> U | 1σ     | Age (Ma)                             |       |                                     |      |                                     |     |
|--------------------|----------------|------|-------------------------------------|--------------------------------------|--------|-------------------------------------|--------|-------------------------------------|--------|--------------------------------------|-------|-------------------------------------|------|-------------------------------------|-----|
|                    | (ppm)          |      |                                     |                                      |        |                                     |        |                                     |        | <sup>207</sup> Pb/ <sup>206</sup> Pb | 1σ    | <sup>207</sup> Pb/ <sup>235</sup> U | 1σ   | <sup>206</sup> Pb/ <sup>238</sup> U | 1σ  |
|                    | Th             | U    |                                     |                                      |        |                                     |        |                                     |        |                                      |       |                                     |      |                                     |     |
| N3-01 monzogranite |                |      |                                     |                                      |        |                                     |        |                                     |        |                                      |       |                                     |      |                                     |     |
| N3-01-01           | 626            | 1380 | 0.4533                              | 0.0482                               | 0.0014 | 0.1660                              | 0.0045 | 0.0249                              | 0.0002 | 109                                  | 66.7  | 156                                 | 3.9  | 159                                 | 1.2 |
| N3-01-02           | 1179           | 916  | 1.2860                              | 0.0500                               | 0.0017 | 0.1700                              | 0.0044 | 0.0247                              | 0.0002 | 198                                  | 77.8  | 159                                 | 3.8  | 157                                 | 1.3 |
| N3-01-03           | 293            | 450  | 0.6507                              | 0.0494                               | 0.0021 | 0.1694                              | 0.0069 | 0.0250                              | 0.0003 | 165                                  | 100.0 | 159                                 | 6.0  | 159                                 | 1.7 |
| N3-01-04           | 689            | 1104 | 0.6240                              | 0.0501                               | 0.0015 | 0.1704                              | 0.0042 | 0.0246                              | 0.0002 | 198                                  | 68.5  | 160                                 | 3.7  | 157                                 | 1.2 |
| N3-01-05           | 431            | 643  | 0.6713                              | 0.0485                               | 0.0022 | 0.1680                              | 0.0055 | 0.0251                              | 0.0002 | 124                                  | 107.4 | 158                                 | 4.8  | 160                                 | 1.5 |
| N3-01-06           | 1033           | 1010 | 1.0234                              | 0.0498                               | 0.0017 | 0.1694                              | 0.0046 | 0.0247                              | 0.0002 | 187                                  | 79.6  | 159                                 | 4.0  | 157                                 | 1.1 |
| N3-01-07           | 1506           | 1453 | 1.0365                              | 0.0395                               | 0.0034 | 0.1265                              | 0.0108 | 0.0232                              | 0.0002 | -                                    | -     | 121                                 | 9.7  | 148                                 | 1.1 |
| N3-01-08           | 531            | 605  | 0.8781                              | 0.0503                               | 0.0020 | 0.1673                              | 0.0057 | 0.0242                              | 0.0002 | 209                                  | 88.0  | 157                                 | 5.0  | 154                                 | 1.4 |
| N3-01-09           | 1581           | 1275 | 1.2403                              | 0.0483                               | 0.0012 | 0.1633                              | 0.0040 | 0.0245                              | 0.0002 | 122                                  | 59.3  | 154                                 | 3.5  | 156                                 | 1.1 |
| N3-01-10           | 923            | 1305 | 0.7068                              | 0.0501                               | 0.0011 | 0.1703                              | 0.0035 | 0.0247                              | 0.0002 | 198                                  | 54.6  | 160                                 | 3.1  | 157                                 | 1.0 |
| N3-01-11           | 610            | 940  | 0.6491                              | 0.0500                               | 0.0012 | 0.1705                              | 0.0041 | 0.0247                              | 0.0002 | 195                                  | 26.8  | 160                                 | 3.6  | 157                                 | 1.1 |
| N3-01-12           | 964            | 1229 | 0.7839                              | 0.0507                               | 0.0022 | 0.1711                              | 0.0041 | 0.0245                              | 0.0002 | 233                                  | 100.0 | 160                                 | 3.6  | 156                                 | 1.2 |
| N3-01-13           | 721            | 742  | 0.9713                              | 0.0500                               | 0.0013 | 0.1711                              | 0.0046 | 0.0247                              | 0.0002 | 198                                  | 28.7  | 160                                 | 4.0  | 158                                 | 1.3 |
| N3-01-14           | 2018           | 1273 | 1.5855                              | 0.0599                               | 0.0076 | 0.1688                              | 0.0209 | 0.0184                              | 0.0003 | 611                                  | 277.7 | 158                                 | 18.2 | 117                                 | 2.1 |
| N3-01-15           | 339            | 461  | 0.7355                              | 0.0503                               | 0.0031 | 0.1772                              | 0.0090 | 0.0256                              | 0.0003 | 209                                  | 144.4 | 166                                 | 7.7  | 163                                 | 2.0 |
| N3-01-16           | 557            | 1039 | 0.5357                              | 0.0499                               | 0.0012 | 0.1723                              | 0.0042 | 0.0250                              | 0.0002 | 191                                  | 62.0  | 161                                 | 3.6  | 159                                 | 1.1 |
| N3-01-17           | 1494           | 1387 | 1.0768                              | 0.0501                               | 0.0015 | 0.1683                              | 0.0039 | 0.0243                              | 0.0002 | 198                                  | 102.8 | 158                                 | 3.4  | 155                                 | 1.1 |
| N3-01-18           | 801            | 1030 | 0.7778                              | 0.0503                               | 0.0014 | 0.1702                              | 0.0046 | 0.0245                              | 0.0002 | 209                                  | 64.8  | 160                                 | 4.0  | 156                                 | 1.1 |
| N3-01-19           | 744            | 1037 | 0.7177                              | 0.0496                               | 0.0014 | 0.1682                              | 0.0047 | 0.0246                              | 0.0002 | 172                                  | 66.7  | 158                                 | 4.1  | 157                                 | 1.2 |
| N3-01-20           | 705            | 640  | 1.1004                              | 0.0482                               | 0.0019 | 0.1673                              | 0.0055 | 0.0251                              | 0.0002 | 106                                  | 92.6  | 157                                 | 4.8  | 160                                 | 1.4 |
