# Supplementary material for: Geochronology and Tectonic Implications of the Nianzigou Granites and Associated Mo Deposit, Inner Mongolia
Source: MDPI journal article supplement (doi:10.3390/min12070791), 2022-06-21
Supplement: s1 [file s1]

**Table S4.** Major element oxides (wt%) of the Nianzigou granite

| No.                             | N1-3         | N1-9         | N1-10        | N2-4     | N3-1     | N3-4-1       | N3-4-2       |
|---------------------------------|--------------|--------------|--------------|----------|----------|--------------|--------------|
| lithology                       | Biotite      | Biotite      | Biotite      | Granite  | Granite  | Biotite      | Biotite      |
|                                 | Monzogranite | Monzogranite | Monzogranite | Porphyry | Porphyry | Monzogranite | Monzogranite |
| SiO <sub>2</sub>                | 69.24        | 72.67        | 72.50        | 73.10    | 86.41    | 80.38        | 70.52        |
| TiO <sub>2</sub>                | 0.70         | 0.45         | 0.44         | 0.51     | 0.10     | 0.12         | 0.50         |
| Al <sub>2</sub> O <sub>3</sub>  | 13.52        | 13.31        | 13.58        | 13.08    | 7.25     | 10.62        | 12.89        |
| TFe <sub>2</sub> O <sub>3</sub> | 4.64         | 2.67         | 2.28         | 2.54     | 0.53     | 0.61         | 3.32         |
| MnO                             | 0.12         | 0.05         | 0.05         | 0.06     | 0.01     | 0.01         | 0.07         |
| MgO                             | 1.52         | 0.68         | 0.61         | 0.65     | 0.07     | 0.12         | 1.59         |
| CaO                             | 2.15         | 1.41         | 1.14         | 1.40     | 0.03     | 0.24         | 1.64         |
| Na <sub>2</sub> O               | 3.91         | 3.73         | 3.73         | 3.68     | 1.97     | 2.78         | 4.07         |
| K <sub>2</sub> O                | 3.99         | 4.49         | 4.70         | 4.66     | 3.08     | 4.31         | 4.13         |
| P <sub>2</sub> O <sub>5</sub>   | 0.20         | 0.141        | 0.129        | 0.15     | 0.02     | 0.03         | 0.14         |
| LOI                             | 0.41         | 0.39         | 0.86         | 0.17     | 0.53     | 0.78         | 1.13         |
| Total                           | 100.40       | 99.99        | 100.02       | 100.00   | 100.00   | 100.00       | 100.00       |
| A/CNK                           | 0.92         | 0.98         | 1.02         | 0.96     | 1.09     | 1.10         | 0.91         |
| A/NK                            | 1.23         | 1.21         | 1.21         | 1.18     | 1.10     | 1.15         | 1.15         |
| TA                              | 7.90         | 8.22         | 8.43         | 8.34     | 5.05     | 7.09         | 8.20         |
