# Supplementary material for: Geochronology and Tectonic Implications of the Nianzigou Granites and Associated Mo Deposit, Inner Mongolia
Source: MDPI journal article supplement (doi:10.3390/min12070791), 2022-06-21
Supplement: s1 [file s1]

**Table S2. Trace element compositions of the Nianzigou granite ( $\mu\text{g/g}$ )**

| No.                | N1-03        | N1-10        | N3-04-2      | N1-09        | N2-04    | N3-01    | N3-04-1      |
|--------------------|--------------|--------------|--------------|--------------|----------|----------|--------------|
| Lithology          | Biotite      | Biotite      | Biotite      | Biotite      | Granite  | Granite  | Biotite      |
|                    | Monzogranite | Monzogranite | Monzogranite | Monzogranite | Porphyry | Porphyry | Monzogranite |
| Li                 | 34.80        | 39.54        | 36.48        | 45.74        | 9.62     | 22.80    | 51.42        |
| Sc                 | 13.471       | 5.282        | 5.318        | 6.215        | 2.915    | 3.183    | 7.154        |
| V                  | 53.60        | 32.99        | 28.19        | 32.33        | 10.80    | 8.44     | 32.29        |
| Cr                 | 47.74        | 7.38         | 6.16         | 7.41         | 4.74     | 9.41     | 8.56         |
| Mn                 | 954.80       | 438.60       | 386.60       | 476.40       | 159.58   | 78.92    | 576.80       |
| Co                 | 25.517       | 44.536       | 31.996       | 23.560       | 42.142   | 30.286   | 24.320       |
| Ni                 | 2.998        | 0.776        | 4.435        | 2.504        | 0.124    | 0.042    | 0.042        |
| Cu                 | 8.888        | 6.296        | 18.800       | 13.122       | 15.542   | 9.494    | 8.368        |
| Zn                 | 72.036       | 30.492       | 39.294       | 68.436       | 16.895   | 11.965   | 50.742       |
| Ga                 | 20.628       | 19.674       | 19.638       | 19.998       | 18.594   | 18.108   | 19.620       |
| Rb                 | 158.180      | 194.100      | 201.600      | 196.400      | 269.800  | 249.400  | 194.600      |
| Sr                 | 235.600      | 232.200      | 233.800      | 264.000      | 62.360   | 63.920   | 216.800      |
| Y                  | 28.840       | 20.080       | 19.286       | 26.440       | 10.224   | 6.226    | 20.540       |
| Zr                 | 279.400      | 252.400      | 192.460      | 195.740      | 96.540   | 77.460   | 226.600      |
| Nb                 | 23.620       | 19.130       | 19.286       | 23.800       | 14.048   | 13.944   | 21.720       |
| Cs                 | 4.688        | 4.304        | 4.488        | 3.406        | 2.844    | 4.528    | 3.986        |
| Ba                 | 630.400      | 785.200      | 841.400      | 948.800      | 255.800  | 232.000  | 670.600      |
| La                 | 57.920       | 41.880       | 42.020       | 50.580       | 30.960   | 27.000   | 46.040       |
| Ce                 | 116.260      | 84.280       | 83.340       | 102.760      | 46.080   | 40.940   | 89.540       |
| Pr                 | 12.400       | 8.698        | 8.912        | 11.268       | 4.352    | 3.658    | 9.164        |
| Nd                 | 43.680       | 29.900       | 31.080       | 39.600       | 13.326   | 10.506   | 31.320       |
| Sm                 | 7.530        | 5.018        | 5.252        | 6.778        | 1.999    | 1.450    | 5.262        |
| Eu                 | 1.357        | 1.007        | 1.048        | 1.298        | 0.363    | 0.289    | 1.009        |
| Gd                 | 5.852        | 3.828        | 4.010        | 5.214        | 1.553    | 1.028    | 3.984        |
| Tb                 | 0.830        | 0.544        | 0.561        | 0.743        | 0.227    | 0.136    | 0.560        |
| Dy                 | 4.748        | 3.154        | 3.174        | 4.290        | 1.419    | 0.818    | 3.190        |
| Ho                 | 0.980        | 0.654        | 0.643        | 0.886        | 0.309    | 0.177    | 0.663        |
| Er                 | 2.904        | 1.981        | 1.890        | 2.644        | 1.029    | 0.613    | 1.980        |
| Tm                 | 0.418        | 0.291        | 0.270        | 0.381        | 0.169    | 0.104    | 0.293        |
| Yb                 | 2.854        | 2.046        | 1.874        | 2.640        | 1.333    | 0.905    | 2.088        |
| Lu                 | 0.417        | 0.307        | 0.279        | 0.378        | 0.219    | 0.161    | 0.310        |
| Hf                 | 6.170        | 5.545        | 4.568        | 4.598        | 3.193    | 2.488    | 5.182        |
| Ta                 | 1.421        | 1.487        | 1.271        | 1.543        | 0.889    | 0.909    | 1.824        |
| Pb                 | 10.938       | 11.850       | 13.893       | 12.608       | 10.683   | 11.608   | 11.743       |
| Th                 | 28.625       | 19.560       | 21.550       | 11.178       | 23.183   | 18.358   | 16.428       |
| U                  | 5.743        | 6.408        | 9.640        | 3.318        | 2.578    | 3.295    | 5.075        |
| $\Sigma\text{REE}$ | 258.150      | 183.588      | 184.353      | 229.46       | 103.338  | 87.785   | 195.403      |
| LREE               | 239.147      | 170.783      | 171.652      | 212.284      | 97.08    | 83.843   | 182.335      |
| HREE               | 19.003       | 12.805       | 12.701       | 17.176       | 6.258    | 3.942    | 13.068       |
| (La/Yb)N           | 14.557       | 14.683       | 16.084       | 13.743       | 16.660   | 21.400   | 15.816       |
| $\delta\text{Eu}$  | 0.625        | 0.702        | 0.698        | 0.668        | 0.630    | 0.724    | 0.674        |
