# Supplementary material for: Geochronology and Tectonic Implications of the Nianzigou Granites and Associated Mo Deposit, Inner Mongolia
Source: MDPI journal article supplement (doi:10.3390/min12070791), 2022-06-21
Supplement: s1 [file s1]

Table S3. Re-Os isotopic data of molybdenites from the the Nianzigou Mo deposit.

| Samples | Weight<br>(g) | Re (ng.g <sup>-1</sup> ) |      | Normal Os (ng.g <sup>-1</sup> ) |         | <sup>187</sup> Re (ng.g <sup>-1</sup> ) |      | <sup>187</sup> Os (ng.g <sup>-1</sup> ) |      | Model age (Ma) |      |
|---------|---------------|--------------------------|------|---------------------------------|---------|-----------------------------------------|------|-----------------------------------------|------|----------------|------|
|         |               | Concentration            | ± 2σ | Concentration                   | ± 2σ    | Concentration                           | ± 2σ | Concentration                           | ± 2σ | Concentration  | ± 2σ |
| N1-1    | 0.05119       | 24930                    | 230  | 0.10160                         | 0.01870 | 15669                                   | 144  | 40.37                                   | 0.29 | 154.4          | 2.4  |
| N1-2    | 0.05146       | 20848                    | 166  | 0.08884                         | 0.02448 | 13104                                   | 105  | 33.37                                   | 0.20 | 152.7          | 2.1  |
| N1-3    | 0.04951       | 11860                    | 79   | 0.05500                         | 0.01332 | 7454                                    | 49   | 19.14                                   | 0.14 | 153.9          | 2.1  |
| N1-12   | 0.05149       | 22422                    | 238  | 0.00056                         | 0.04859 | 14092                                   | 149  | 36.55                                   | 0.27 | 155.5          | 2.5  |
| N1-13   | 0.05047       | 13169                    | 99   | 0.04787                         | 0.00754 | 8277                                    | 62   | 21.27                                   | 0.13 | 154.1          | 2.1  |
| N2-6    | 0.05062       | 7839                     | 48   | 0.00536                         | 0.01831 | 4927                                    | 30   | 12.62                                   | 0.09 | 153.5          | 2.1  |
